# Supplementary material
Source: MDPI journal article supplement (https://www.mdpi.com/2073-4441/15/20/3636)
Supplement: s1 [file s1 › water-2640254-supplementary.pdf]

# Survey on Lombardy Region Wastewater Effluents and Application of Biochar from Biological Sewage Sludge for Wastewater Treatment

Maria Cristina Collivignarelli <sup>1,2</sup>, Francesca Maria Caccamo <sup>1,\*</sup>, Stefano Bellazzi <sup>1,\*</sup>, Maria Medina Llamas <sup>3,4</sup>, Sabrina Sorlini <sup>5</sup> and Chiara Milanese <sup>3</sup>

## Supplementary Materials

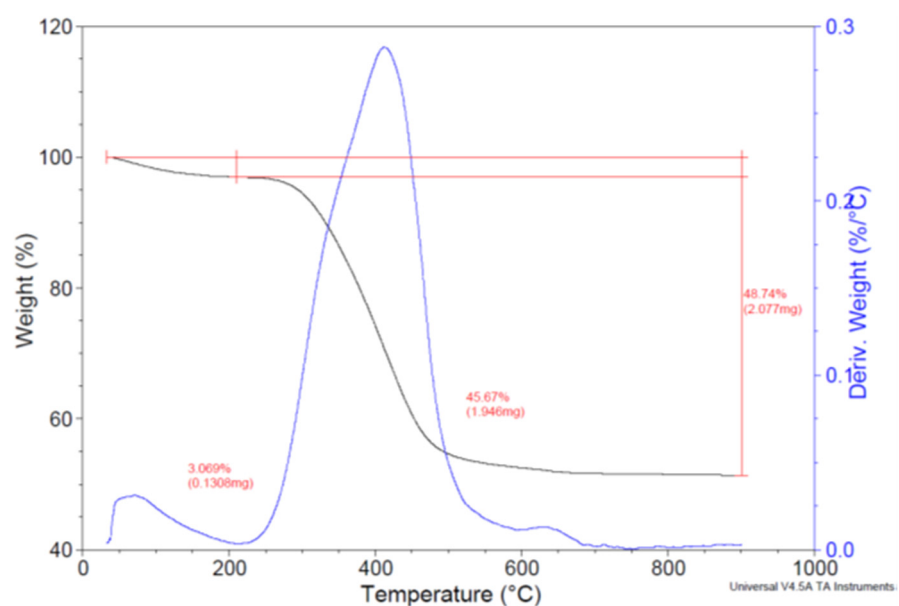

(a)

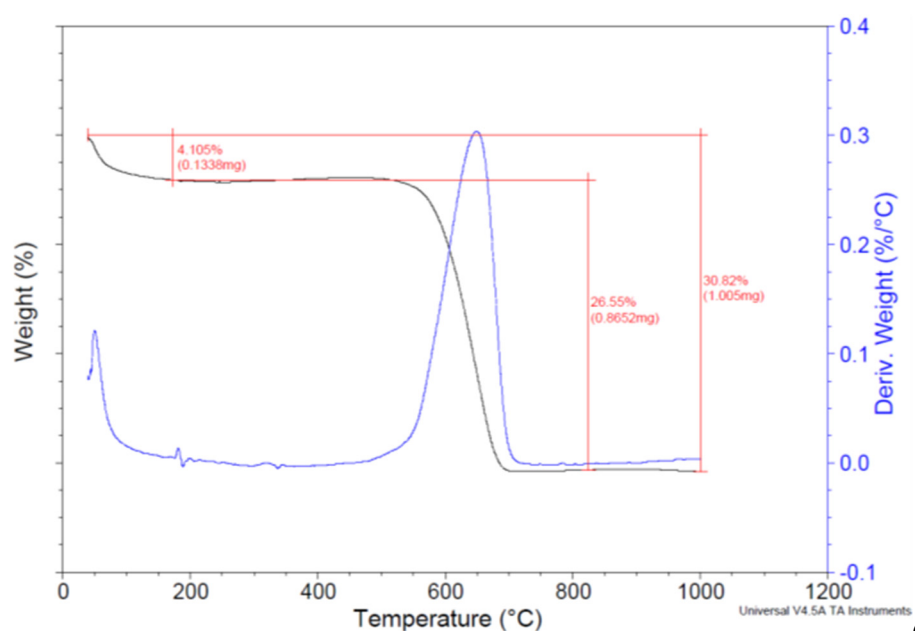

(b)

---

**Figure S1.** Thermogravimetric (black line) and weight derivative (blue line) curves obtained for the dried sludge pyrolysed at 350 °C (a) and 950 °C (b).

(a)

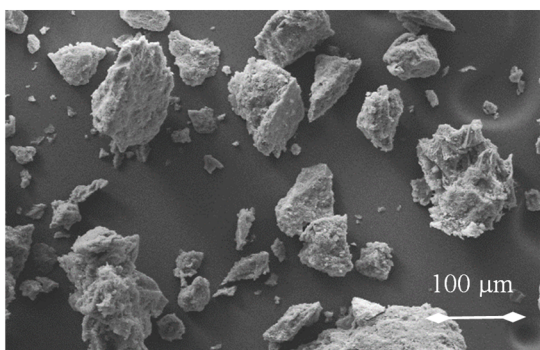

(b)

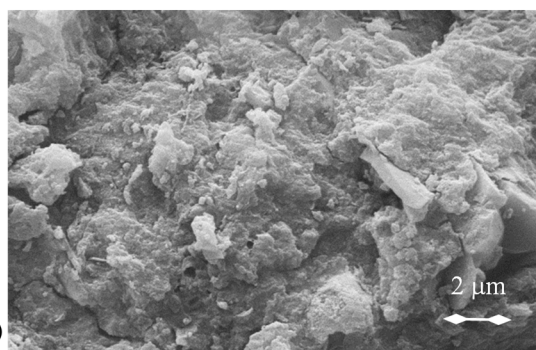

(c)

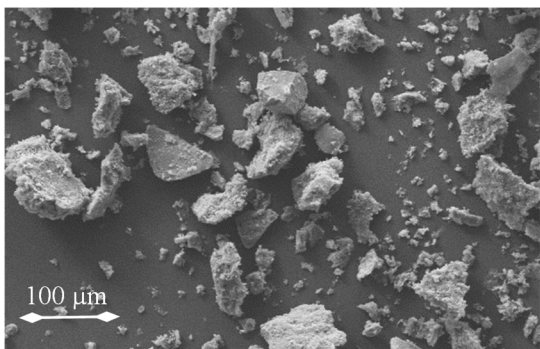

(d)

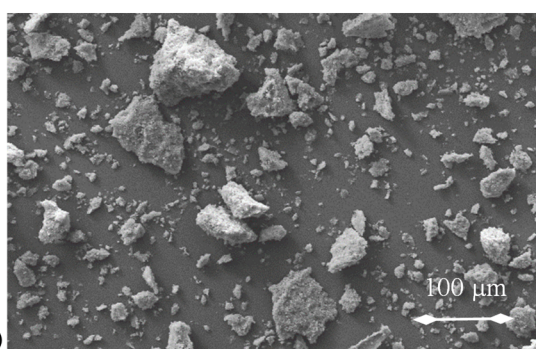

(e)

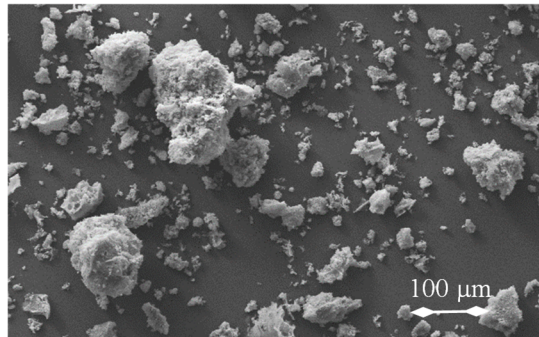

(f)

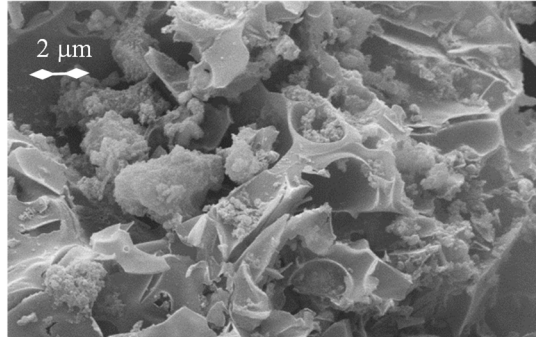

(g)

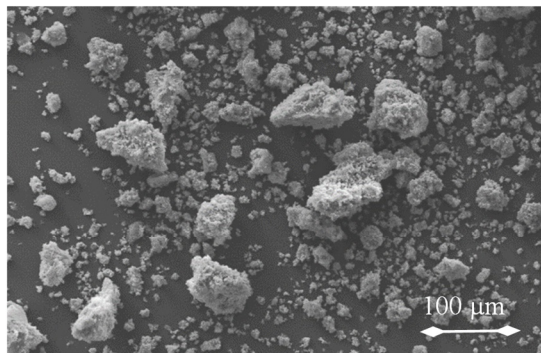

(h)

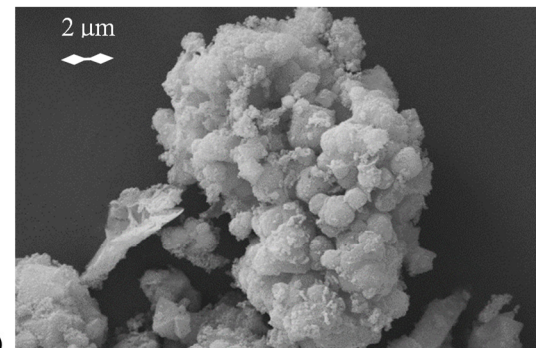

**Figure S2:** SEM images for (a, b) the dried sludge, the samples pyrolyzed at 350 °C (c) and 650 °C (d), and the samples activated after pyrolysis at 350 °C (e,f) and 650 °C (g,h). Higher magnification: 10000 X; lower magnification: 500 X.

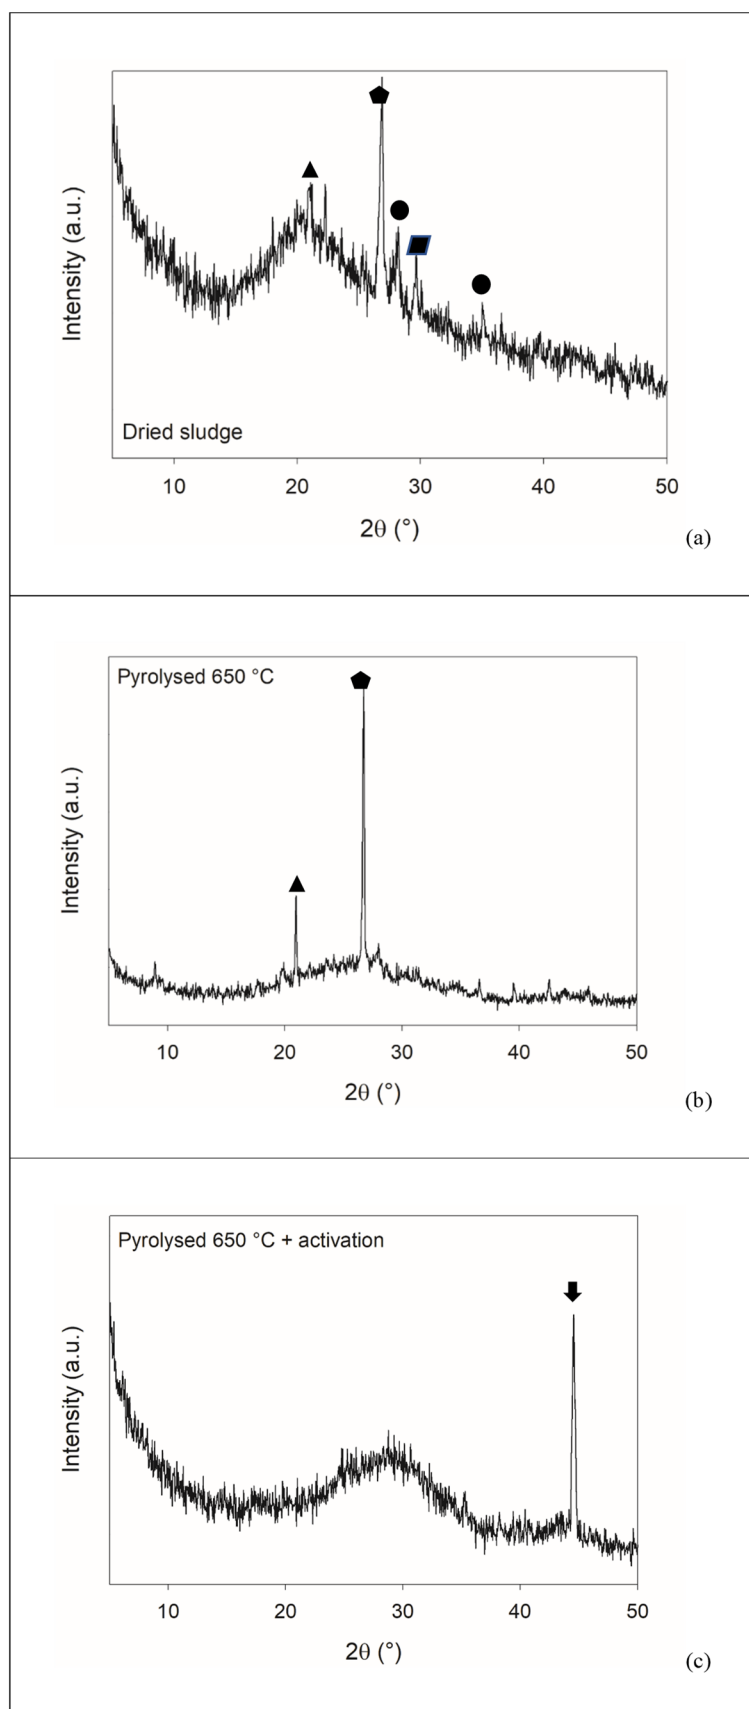

**Figure S3.** XRPD patterns for (a) the dried sludge, (b) the sample pyrolyzed at 650 °C, (c) the sample pyrolyzed at 650 °C and activated. = SiO<sub>2</sub>, = graphitic C, = aluminium phosphate, = calcium carbonate, = Fe .

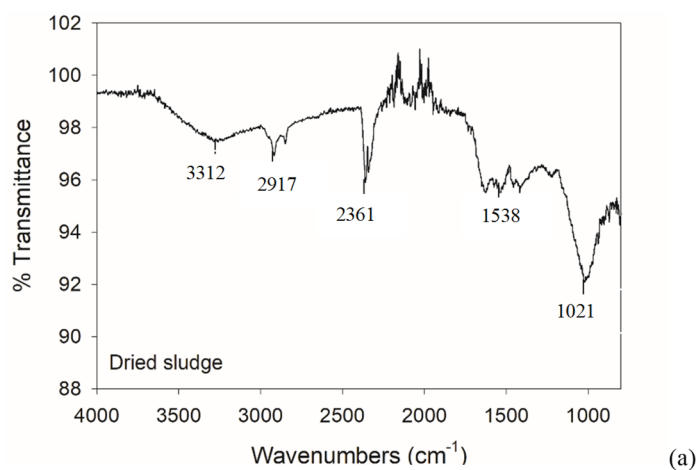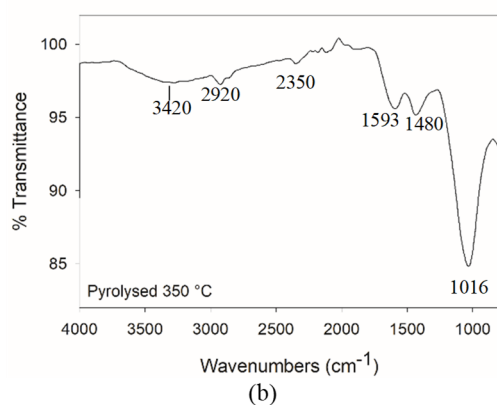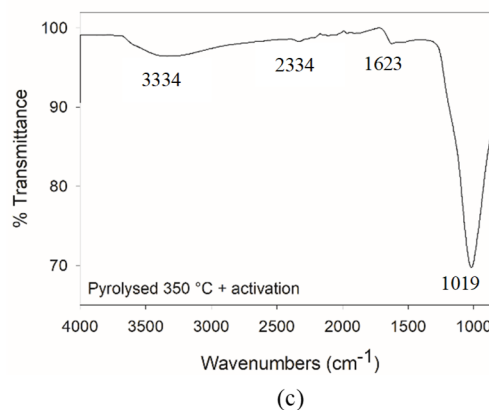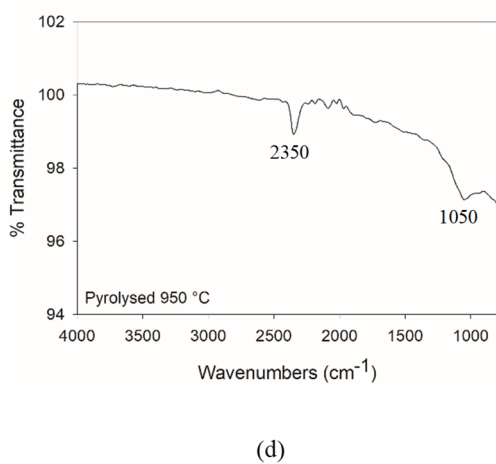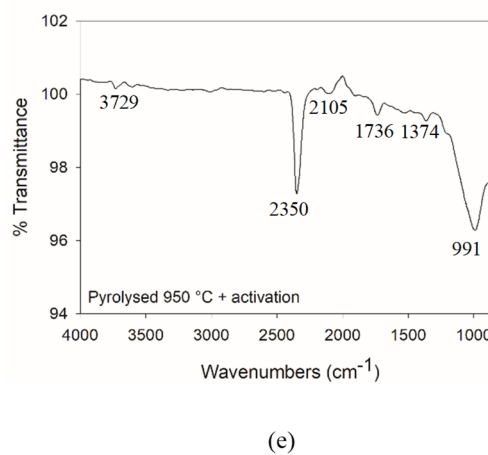

---

**Figure S4.** FT-IR spectra for (a) the dried sludge, (b) the sample pyrolysed at 350 °C, (c) the sample pyrolyzed at 350 °C and activated, (d) the sample pyrolyzed at 950 °C, (e) the sample pyrolysed at 950 °C and activated.
